# Supplementary material for: Benthic primary production in an upwelling-influenced coral reef, Colombian Caribbean
Source: PeerJ. 2014 Sep 2;2:e554. doi: 10.7717/peerj.554 (PMC4157237; doi:10.7717/peerj.554)
Supplement: Table S2 — Goodness of fit for all 19 general linear models including the three independent variables benthic group, season, and site and their interactions. Dependent variables have been individual net and gross production, contribution of functional groups to benthic net and gross production, and total daily benthic net and gross production, respectively. Grey box indicates inclusion of the independent variable in the respective model. Abbreviations: DIC, deviance information criterion delta; DIC, difference in DIC compared to the model with highest fit; DICwt, DIC weights, i.e., the support for respective the mode. [file peerj-02-554-s002.xlsx]

## Sheet: DICwt
		Intercept	Benthic group	Site	Season	Interaction Benthic group & Site	Interaction Benthic group & Season	Interaction Season & Site	Interaction Benthic group & Site & Season	DIC	ΔDIC	DICwt
Individual net production
	Model1									814.197	163.39	0
	Model2									673.43	22.62	0
	Model3									815.765	164.96	0
	Model4									813.369	162.56	0
	Model5									675.471	24.66	0
	Model6									675.021	24.21	0
	Model7									814.832	164.02	0
	Model8									677.058	26.25	0
	Model9									676.904	26.1	0
	Model10									652.65	1.84	0.1955
	Model11									812.623	161.81	0
	Model12									678.78	27.97	0
	Model13									654.741	3.93	0.0687
	Model14									676.571	25.76	0
	Model15									654.944	4.14	0.0621
	Model16									679.193	28.39	0
	Model17									653.669	2.86	0.1175
	Model18									654.854	4.05	0.065
	Model19									650.808	0	0.4912
Individual gross production
	Model1									377.87	173.65	0
	Model2									227.808	23.58	0
	Model3									379.671	175.45	0
	Model4									379.762	175.54	0
	Model5									229.478	25.25	0
	Model6									226.48	22.26	0
	Model7									381.581	177.36	0
	Model8									228.025	23.8	0
	Model9									230.657	26.43	0
	Model10									218.759	14.54	0.0007
	Model11									378.855	174.63	0
	Model12									227.833	23.61	0
	Model13									220.533	16.31	0.0003
	Model14									226.372	22.15	0
	Model15									220.392	16.17	0.0003
	Model16									227.507	23.28	0
	Model17									217.274	13.05	0.0015
	Model18									218.157	13.93	0.0009
	Model19									204.223	0	0.9962
Contribution to total net production
	Model1									488.288	260.72	0
	Model2									306.691	79.12	0
	Model3									487.454	259.88	0
	Model4									484.588	257.02	0
	Model5									299.064	71.49	0
	Model6									303.952	76.38	0
	Model7									483.338	255.77	0
	Model8									295.191	67.62	0
	Model9									272.206	44.64	0
	Model10									289.756	62.19	0
	Model11									482.712	255.14	0
	Model12									271.02	43.45	0
	Model13									283.031	55.46	0
	Model14									295.492	67.92	0
	Model15									233.162	5.59	0.0552
	Model16									272.977	45.41	0
	Model17									284.349	56.78	0
	Model18									233.766	6.2	0.0408
	Model19									227.569	0	0.904
Contribution to total gross production
	Model1									377.87	173.65	0
	Model2									227.808	23.58	0
	Model3									379.671	175.45	0
	Model4									229.478	25.25	0
	Model5									379.762	175.54	0
	Model6									226.48	22.26	0
	Model7									381.581	177.36	0
	Model8									228.025	23.8	0
	Model9									230.657	26.43	0
	Model10									378.855	174.63	0
	Model11									226.372	22.15	0
	Model12									218.759	14.54	0.0007
	Model13									227.833	23.61	0
	Model14									220.392	16.17	0.0003
	Model15									220.533	16.31	0.0003
	Model16									227.507	23.28	0
	Model17									217.274	13.05	0.0015
	Model18									218.157	13.93	0.0009
	Model19									204.223	0	0.9962
Total daily net production
	Model1									2223.23	306.2	0
	Model2									2051.12	134.08	0
	Model3									2216.23	299.19	0
	Model4									2200.35	283.31	0
	Model5									2033.71	116.68	0
	Model6									2022.58	105.54	0
	Model7									2192.17	275.13	0
	Model8									2001.66	84.63	0
	Model9									2022.1	105.06	0
	Model10									1965.75	48.71	0
	Model11									2191.43	274.4	0
	Model12									1988.99	71.95	0
	Model13									1946.23	29.19	0
	Model14									2000.96	83.93	0
	Model15									1917.04	0	0.8284
	Model16									1989.59	72.56	0
	Model17									1947.71	30.67	0
	Model18									1920.7	3.66	0.1328
	Model19									1923.16	6.12	0.0388
Total daily gross production
	Model1									1041.91	552.93	0
	Model2									705.424	216.44	0
	Model3									1042.17	553.18	0
	Model4									1028.12	539.14	0
	Model5									700.589	211.6	0
	Model6									671.856	182.87	0
	Model7									1028.44	539.45	0
	Model8									666.708	177.72	0
	Model9									643.103	154.12	0
	Model10									643.72	154.74	0
	Model11									1030.11	541.12	0
	Model12									596.838	107.85	0
	Model13									639.491	150.51	0
	Model14									668.079	179.09	0
	Model15									533.363	44.38	0
	Model16									598.013	109.03	0
	Model17									642.739	153.76	0
	Model18									535.902	46.92	0
	Model19									488.984	0	1
