# Supplementary material for: Benthic primary production in an upwelling-influenced coral reef, Colombian Caribbean
Source: PeerJ. 2014 Sep 2;2:e554. doi: 10.7717/peerj.554 (PMC4157237; doi:10.7717/peerj.554)
Supplement: Table S3 — Pair-wise comparisons between means and sums of functional groups as estimated by the posterior distribution of Bayesian generalized linear models. Abbreviations: EXP, exposed; SHE, sheltered; NoUp, non-upwelling; Up, upwelling; Lower HPD, lower 95% confidence interval of highest posterior density; Upper HPD, upper 95% confidence interval of highest posterior density. [file peerj-02-554-s003.xlsx]

## Sheet: PairWise
	Group A	Group B	Mean Group A	Lower HPD	Upper HPD	Mean Group B	Lower HPD	Upper HPD	Mean difference	Lower HPD	Upper HPD	HPD of difference includes zero	pMCMC
Individual net production
	Algal Turf EXP NoUp	Algal Turf SHE NoUp	3.599	1.111	6.127	5.108	2.626	7.574	-1.508	-4.309	1.176	0	0.278
	Algal Turf EXP Up	Algal Turf SHE Up	9.161	6.528	11.812	12.4	9.675	15.161	-3.239	-6.155	-0.286	1	0.03
	Algal Turf EXP NoUp	Algal Turf EXP Up	3.599	1.111	6.127	9.161	6.528	11.812	-5.561	-9.2	-1.906	1	0.003
	Algal Turf SHE NoUp	Algal Turf SHE Up	5.108	2.626	7.574	12.4	9.675	15.161	-7.292	-10.999	-3.598	1	0
	CCA EXP NoUp	CCA SHE NoUp	5.108	2.487	7.799	2.356	0.297	4.573	2.752	0.105	5.44	1	0.044
	CCA EXP Up	CCA SHE Up	3.236	0.964	5.493	5.609	3.062	8.037	-2.373	-4.971	0.234	0	0.074
	CCA EXP NoUp	CCA EXP Up	5.108	2.487	7.799	3.236	0.964	5.493	1.872	-1.62	5.398	0	0.293
	CCA SHE NoUp	CCA SHE Up	2.356	0.297	4.573	5.609	3.062	8.037	-3.253	-6.572	0.08	0	0.057
	Corals EXP NoUp	Corals SHE NoUp	16.1	14.55	17.645	15.539	13.889	17.207	0.561	-1.234	2.284	0	0.531
	Corals EXP Up	Corals SHE Up	13.095	11.028	15.108	11.234	9.327	13.18	1.861	-0.325	4.036	0	0.092
	Corals EXP NoUp	Corals EXP Up	16.1	14.55	17.645	13.095	11.028	15.108	3.005	0.497	5.62	1	0.022
	Corals SHE NoUp	Corals SHE Up	15.539	13.889	17.207	11.234	9.327	13.18	4.306	1.748	6.837	1	0.001
	Macroalgae EXP Up	Macroalgae SHE Up	2.6	-0.241	5.641	3.065	0.501	5.599	-0.465	-3.516	2.607	0	0.759
	Macroalgae SHE NoUp	Macroalgae SHE Up	4.291	1.749	6.963	3.065	0.501	5.599	1.226	-2.461	4.876	0	0.509
	Microphytobenthos EXP NoUp	Microphytobenthos SHE NoUp	1.951	-0.435	4.569	0.731	-1.324	2.991	1.22	-1.404	3.808	0	0.351
	Microphytobenthos EXP Up	Microphytobenthos SHE Up	0.319	-1.587	2.37	2.27	-0.459	5.267	-1.952	-4.833	0.776	0	0.164
	Microphytobenthos EXP NoUp	Microphytobenthos EXP Up	1.951	-0.435	4.569	0.319	-1.587	2.37	1.632	-1.516	4.932	0	0.315
	Microphytobenthos SHE NoUp	Microphytobenthos SHE Up	0.731	-1.324	2.991	2.27	-0.459	5.267	-1.539	-5.246	1.997	0	0.404
	Algal Turf EXP	Algal Turf SHE	6.38	4.53	8.183	8.754	6.92	10.618	-2.374	-4.361	-0.331	1	0.022
	Algal Turf NoUp	Algal Turf Up	4.353	2.44	6.308	10.78	8.684	12.86	-6.427	-9.28	-3.581	1	0
	CCA EXP	CCA SHE	4.172	2.431	5.923	3.982	2.357	5.667	0.189	-1.677	2.036	0	0.839
	CCA NoUp	CCA Up	3.732	1.885	5.643	4.422	2.552	6.259	-0.69	-3.322	1.966	0	0.608
	Corals EXP	Corals SHE	14.597	13.316	15.881	13.386	12.123	14.666	1.211	-0.168	2.613	0	0.087
	Corals NoUp	Corals Up	15.82	14.593	17.071	12.164	10.639	13.719	3.656	1.714	5.663	1	0
	Macroalgae EXP	Macroalgae SHE	2.6	-0.241	5.641	3.678	1.89	5.545	-1.077	-4.239	2.188	0	0.505
	Macroalgae NoUp	Macroalgae Up	4.291	1.749	6.963	2.832	0.732	5.026	1.458	-1.896	4.883	0	0.396
	Microphytobenthos EXP	Microphytobenthos SHE	1.135	-0.437	2.76	1.501	-0.297	3.327	-0.366	-2.271	1.575	0	0.712
	Microphytobenthos NoUp	Microphytobenthos Up	1.341	-0.392	3.211	1.295	-0.554	3.241	0.047	-2.584	2.679	0	0.971
	Algal Turf	CCA	7.567	6.147	8.991	4.077	2.77	5.412	3.49	1.559	5.444	1	0
	Algal Turf	Corals	7.567	6.147	8.991	13.992	13.012	14.987	-6.425	-8.189	-4.717	1	0
	Algal Turf	Macroalgae	7.567	6.147	8.991	3.318	1.67	5.028	4.248	2.009	6.435	1	0
	Algal Turf	Microphytobenthos	7.567	6.147	8.991	1.318	0.014	2.648	6.249	4.308	8.199	1	0
	CCA	Corals	4.077	2.77	5.412	13.992	13.012	14.987	-9.915	-11.547	-8.245	1	0
	CCA	Macroalgae	4.077	2.77	5.412	3.318	1.67	5.028	0.759	-1.408	2.873	0	0.482
	CCA	Microphytobenthos	4.077	2.77	5.412	1.318	0.014	2.648	2.759	0.914	4.658	1	0.005
	Corals	Macroalgae	13.992	13.012	14.987	3.318	1.67	5.028	10.674	8.726	12.634	1	0
	Corals	Microphytobenthos	13.992	13.012	14.987	1.318	0.014	2.648	12.674	11.011	14.301	1	0
	Macroalgae	Microphytobenthos	3.318	1.67	5.028	1.318	0.014	2.648	2	-0.147	4.136	0	0.065
	EXP	SHE	6.13	5.332	6.928	6.26	5.5	7.024	-0.13	-1.084	0.779	0	0.785
	NoUp	Up	6.087	5.265	6.916	6.299	5.44	7.158	-0.212	-1.391	0.987	0	0.727
Individual gross production
	Algal Turf EXP NoUp	Algal Turf SHE NoUp	5.127	2.817	7.54	8.379	5.611	11.334	-3.252	-6.985	0.501	0	0.084
	Algal Turf EXP Up	Algal Turf SHE Up	11.576	8.243	15.073	16.853	12.698	21.174	-5.276	-10.74	0.223	0	0.057
	Algal Turf EXP NoUp	Algal Turf EXP Up	5.127	2.817	7.54	11.576	8.243	15.073	-6.45	-10.754	-2.355	1	0.002
	Algal Turf SHE NoUp	Algal Turf SHE Up	8.379	5.611	11.334	16.853	12.698	21.174	-8.474	-13.721	-3.413	1	0.001
	CCA EXP NoUp	CCA SHE NoUp	6.713	4.024	9.523	2.148	0.89	3.497	4.565	1.476	7.634	1	0.002
	CCA EXP Up	CCA SHE Up	2.988	1.483	4.639	7.618	4.958	10.371	-4.631	-7.805	-1.471	1	0.003
	CCA EXP NoUp	CCA EXP Up	6.713	4.024	9.523	2.988	1.483	4.639	3.726	0.643	7.085	1	0.018
	CCA SHE NoUp	CCA SHE Up	2.148	0.89	3.497	7.618	4.958	10.371	-5.47	-8.619	-2.558	1	0
	Corals EXP NoUp	Corals SHE NoUp	18.818	16.39	21.237	17.818	15.193	20.407	1	-2.589	4.539	0	0.576
	Corals EXP Up	Corals SHE Up	20.756	17.344	24.433	17.373	14.36	20.486	3.383	-1.233	8.13	0	0.154
	Corals EXP NoUp	Corals EXP Up	18.818	16.39	21.237	20.756	17.344	24.433	-1.938	-6.18	2.389	0	0.376
	Corals SHE NoUp	Corals SHE Up	17.818	15.193	20.407	17.373	14.36	20.486	0.445	-3.651	4.432	0	0.826
	Macroalgae EXP Up	Macroalgae SHE Up	3.359	1.177	5.848	3.989	2.031	6.095	-0.63	-3.741	2.636	0	0.672
	Macroalgae SHE NoUp	Macroalgae SHE Up	5.454	3.253	7.723	3.989	2.031	6.095	1.465	-1.594	4.522	0	0.341
	Microphytobenthos EXP NoUp	Microphytobenthos SHE NoUp	5.09	2.56	7.77	4.024	2.052	6.142	1.066	-2.288	4.457	0	0.533
	Microphytobenthos EXP Up	Microphytobenthos SHE Up	3.179	1.594	4.852	6.862	3.426	10.523	-3.684	-7.734	0.187	0	0.05
	Microphytobenthos EXP NoUp	Microphytobenthos EXP Up	5.09	2.56	7.77	3.179	1.594	4.852	1.911	-1.215	5.043	0	0.217
	Microphytobenthos SHE NoUp	Microphytobenthos SHE Up	4.024	2.052	6.142	6.862	3.426	10.523	-2.838	-7.143	1.201	0	0.166
	Algal Turf EXP	Algal Turf SHE	8.352	6.29	10.463	12.616	10.073	15.176	-4.264	-7.599	-0.982	1	0.011
	Algal Turf NoUp	Algal Turf Up	6.753	4.937	8.657	14.215	11.466	16.937	-7.462	-10.779	-4.14	1	0
	CCA EXP	CCA SHE	4.85	3.298	6.479	4.883	3.423	6.448	-0.033	-2.242	2.185	0	0.975
	CCA NoUp	CCA Up	4.431	2.945	6.005	5.303	3.768	6.91	-0.872	-3.053	1.373	0	0.431
	Corals EXP	Corals SHE	19.787	17.66	21.942	17.595	15.624	19.646	2.192	-0.732	5.131	0	0.141
	Corals NoUp	Corals Up	18.318	16.534	20.1	19.065	16.744	21.44	-0.747	-3.725	2.166	0	0.619
	Macroalgae EXP	Macroalgae SHE	3.359	1.177	5.848	4.721	3.23	6.269	-1.363	-4.117	1.545	0	0.337
	Macroalgae NoUp	Macroalgae Up	5.454	3.253	7.723	3.674	2.162	5.286	1.78	-0.957	4.562	0	0.197
	Microphytobenthos EXP	Microphytobenthos SHE	4.134	2.611	5.691	5.443	3.405	7.541	-1.309	-3.913	1.299	0	0.316
	Microphytobenthos NoUp	Microphytobenthos Up	4.557	2.916	6.261	5.02	3.092	7.013	-0.463	-3.1	2.109	0	0.733
	Algal Turf	CCA	10.484	8.857	12.152	4.867	3.786	5.982	5.617	3.61	7.584	1	0
	Algal Turf	Corals	10.484	8.857	12.152	18.691	17.237	20.18	-8.208	-10.44	-6.021	1	0
	Algal Turf	Macroalgae	10.484	8.857	12.152	4.267	3.015	5.593	6.216	4.134	8.318	1	0
	Algal Turf	Microphytobenthos	10.484	8.857	12.152	4.789	3.516	6.105	5.695	3.604	7.803	1	0
	CCA	Corals	4.867	3.786	5.982	18.691	17.237	20.18	-13.824	-15.672	-12.01	1	0
	CCA	Macroalgae	4.867	3.786	5.982	4.267	3.015	5.593	0.6	-1.102	2.315	0	0.481
	CCA	Microphytobenthos	4.867	3.786	5.982	4.789	3.516	6.105	0.078	-1.626	1.809	0	0.919
	Corals	Macroalgae	18.691	17.237	20.18	4.267	3.015	5.593	14.424	12.458	16.386	1	0
	Corals	Microphytobenthos	18.691	17.237	20.18	4.789	3.516	6.105	13.903	11.918	15.859	1	0
	Macroalgae	Microphytobenthos	4.267	3.015	5.593	4.789	3.516	6.105	-0.521	-2.38	1.297	0	0.576
	EXP	SHE	8.623	7.771	9.512	9.052	8.178	9.944	-0.429	-1.666	0.819	0	0.495
	NoUp	Up	8.174	7.368	8.985	9.455	8.53	10.397	-1.281	-2.533	-0.054	1	0.042
Contribution to total net production
	Algal Turf EXP NoUp	Algal Turf SHE NoUp	1.059	0.258	1.971	2.044	0.974	3.198	-0.985	-2.439	0.447	0	0.172
	Algal Turf EXP Up	Algal Turf SHE Up	2.603	1.397	3.908	2.404	1.223	3.634	0.2	-1.546	2.012	0	0.821
	Algal Turf EXP NoUp	Algal Turf EXP Up	1.059	0.258	1.971	2.603	1.397	3.908	-1.545	-3.139	-0.014	1	0.049
	Algal Turf SHE NoUp	Algal Turf SHE Up	2.044	0.974	3.198	2.404	1.223	3.634	-0.36	-2.022	1.321	0	0.668
	CCA EXP NoUp	CCA SHE NoUp	2.102	0.912	3.368	0.948	0.249	1.742	1.153	-0.287	2.664	0	0.111
	CCA EXP Up	CCA SHE Up	0.698	0.103	1.361	0.349	-0.003	0.805	0.349	-0.458	1.178	0	0.377
	CCA EXP NoUp	CCA EXP Up	2.102	0.912	3.368	0.698	0.103	1.361	1.404	0.03	2.863	1	0.04
	CCA SHE NoUp	CCA SHE Up	0.948	0.249	1.742	0.349	-0.003	0.805	0.6	-0.287	1.533	0	0.169
	Corals EXP NoUp	Corals SHE NoUp	14.53	12.965	16.129	10.083	8.636	11.574	4.447	2.318	6.609	1	0
	Corals EXP Up	Corals SHE Up	12.277	10.29	14.293	4.879	3.672	6.119	7.398	5.078	9.787	1	0
	Corals EXP NoUp	Corals EXP Up	14.53	12.965	16.129	12.277	10.29	14.293	2.254	-0.354	4.739	0	0.086
	Corals SHE NoUp	Corals SHE Up	10.083	8.636	11.574	4.879	3.672	6.119	5.204	3.3	7.131	1	0
	Macroalgae EXP Up	Macroalgae SHE Up	1.487	0.277	2.859	9.028	6.54	11.619	-7.542	-10.418	-4.624	1	0
	Macroalgae SHE NoUp	Macroalgae SHE Up	2.522	1.31	3.779	9.028	6.54	11.619	-6.507	-9.334	-3.666	1	0
	Microphytobenthos EXP NoUp	Microphytobenthos SHE NoUp	0.265	-0.035	0.787	0.097	-0.083	0.413	0.168	-0.365	0.777	0	0.52
	Microphytobenthos EXP Up	Microphytobenthos SHE Up	0.012	-0.157	0.2	0.867	-0.001	1.86	-0.856	-1.918	0.01	0	0.021
	Microphytobenthos EXP NoUp	Microphytobenthos EXP Up	0.265	-0.035	0.787	0.012	-0.157	0.2	0.253	-0.154	0.821	0	0.215
	Microphytobenthos SHE NoUp	Microphytobenthos SHE Up	0.097	-0.083	0.413	0.867	-0.001	1.86	-0.771	-1.886	0.143	0	0.076
	Algal Turf EXP	Algal Turf SHE	1.831	1.08	2.622	2.224	1.405	3.056	-0.393	-1.535	0.752	0	0.493
	Algal Turf NoUp	Algal Turf Up	1.551	0.864	2.286	2.504	1.658	3.413	-0.952	-2.105	0.183	0	0.099
	CCA EXP	CCA SHE	1.4	0.715	2.106	0.649	0.228	1.11	0.751	-0.083	1.598	0	0.07
	CCA NoUp	CCA Up	1.525	0.815	2.267	0.523	0.149	0.93	1.002	0.177	1.859	1	0.015
	Corals EXP	Corals SHE	13.403	12.123	14.674	7.481	6.525	8.437	5.923	4.337	7.537	1	0
	Corals NoUp	Corals Up	12.307	11.241	13.404	8.578	7.412	9.766	3.729	2.15	5.348	1	0
	Macroalgae EXP	Macroalgae SHE	1.487	0.277	2.859	5.775	4.337	7.185	-4.288	-6.223	-2.274	1	0
	Macroalgae NoUp	Macroalgae Up	2.522	1.31	3.779	5.258	3.859	6.738	-2.736	-4.663	-0.853	1	0.006
	Microphytobenthos EXP	Microphytobenthos SHE	0.138	-0.057	0.418	0.482	0.019	1.003	-0.344	-0.974	0.205	0	0.211
	Microphytobenthos NoUp	Microphytobenthos Up	0.181	-0.022	0.472	0.439	-0.001	0.957	-0.259	-0.887	0.302	0	0.367
	Algal Turf	CCA	2.027	1.47	2.601	1.024	0.624	1.452	1.003	0.292	1.706	1	0.006
	Algal Turf	Corals	2.027	1.47	2.601	10.442	9.647	11.239	-8.415	-9.373	-7.416	1	0
	Algal Turf	Macroalgae	2.027	1.47	2.601	4.346	3.296	5.387	-2.318	-3.534	-1.143	1	0
	Algal Turf	Microphytobenthos	2.027	1.47	2.601	0.31	0.045	0.607	1.717	1.078	2.358	1	0
	CCA	Corals	1.024	0.624	1.452	10.442	9.647	11.239	-9.418	-10.317	-8.516	1	0
	CCA	Macroalgae	1.024	0.624	1.452	4.346	3.296	5.387	-3.322	-4.456	-2.193	1	0
	CCA	Microphytobenthos	1.024	0.624	1.452	0.31	0.045	0.607	0.714	0.204	1.232	1	0.008
	Corals	Macroalgae	10.442	9.647	11.239	4.346	3.296	5.387	6.097	4.758	7.391	1	0
	Corals	Microphytobenthos	10.442	9.647	11.239	0.31	0.045	0.607	10.132	9.286	10.99	1	0
	Macroalgae	Microphytobenthos	4.346	3.296	5.387	0.31	0.045	0.607	4.036	2.953	5.13	1	0
	EXP	SHE	3.892	3.498	4.298	3.322	2.919	3.732	0.57	-0.017	1.13	0	0.05
	NoUp	Up	3.739	3.377	4.104	3.46	3.031	3.894	0.279	-0.285	0.845	0	0.332
Contribution to total gross production
	Algal Turf EXP NoUp	Algal Turf SHE NoUp	1.639	0.739	2.63	3.362	2.155	4.633	-1.723	-3.283	-0.122	1	0.031
	Algal Turf EXP Up	Algal Turf SHE Up	3.523	2.287	4.845	3.117	1.951	4.346	0.407	-1.358	2.16	0	0.647
	Algal Turf EXP NoUp	Algal Turf EXP Up	1.639	0.739	2.63	3.523	2.287	4.845	-1.885	-3.512	-0.296	1	0.021
	Algal Turf SHE NoUp	Algal Turf SHE Up	3.362	2.155	4.633	3.117	1.951	4.346	0.245	-1.522	1.949	0	0.779
	CCA EXP NoUp	CCA SHE NoUp	2.443	1.33	3.642	1.1	0.432	1.85	1.343	-0.005	2.76	0	0.049
	CCA EXP Up	CCA SHE Up	0.761	0.197	1.364	0.424	0.024	0.865	0.337	-0.412	1.109	0	0.365
	CCA EXP NoUp	CCA EXP Up	2.443	1.33	3.642	0.761	0.197	1.364	1.682	0.363	2.996	1	0.009
	CCA SHE NoUp	CCA SHE Up	1.1	0.432	1.85	0.424	0.024	0.865	0.676	-0.148	1.555	0	0.106
	Corals EXP NoUp	Corals SHE NoUp	17.105	15.612	18.572	12.002	10.616	13.387	5.102	3.098	7.151	1	0
	Corals EXP Up	Corals SHE Up	19.131	16.956	21.298	7.839	6.51	9.188	11.291	8.754	13.857	1	0
	Corals EXP NoUp	Corals EXP Up	17.105	15.612	18.572	19.131	16.956	21.298	-2.026	-4.671	0.621	0	0.127
	Corals SHE NoUp	Corals SHE Up	12.002	10.616	13.387	7.839	6.51	9.188	4.163	2.222	6.077	1	0
	Macroalgae EXP Up	Macroalgae SHE Up	1.962	0.691	3.337	11.425	8.955	13.946	-9.464	-12.377	-6.697	1	0
	Macroalgae SHE NoUp	Macroalgae SHE Up	3.177	1.989	4.424	11.425	8.955	13.946	-8.249	-11.043	-5.473	1	0
	Microphytobenthos EXP NoUp	Microphytobenthos SHE NoUp	0.705	0.075	1.401	1.761	0.798	2.763	-1.056	-2.29	0.164	0	0.084
	Microphytobenthos EXP Up	Microphytobenthos SHE Up	0.155	-0.014	0.434	2.016	0.72	3.405	-1.862	-3.296	-0.551	1	0.001
	Microphytobenthos EXP NoUp	Microphytobenthos EXP Up	0.705	0.075	1.401	0.155	-0.014	0.434	0.551	-0.158	1.325	0	0.104
	Microphytobenthos SHE NoUp	Microphytobenthos SHE Up	1.761	0.798	2.763	2.016	0.72	3.405	-0.255	-2.011	1.399	0	0.784
	Algal Turf EXP	Algal Turf SHE	2.581	1.789	3.388	3.239	2.403	4.129	-0.658	-1.859	0.505	0	0.269
	Algal Turf NoUp	Algal Turf Up	2.5	1.723	3.293	3.32	2.451	4.206	-0.82	-2.007	0.353	0	0.17
	CCA EXP	CCA SHE	1.602	0.963	2.267	0.762	0.361	1.198	0.84	0.057	1.628	1	0.031
	CCA NoUp	CCA Up	1.772	1.103	2.467	0.593	0.235	0.971	1.179	0.408	1.974	1	0.002
	Corals EXP	Corals SHE	18.118	16.805	19.437	9.921	8.958	10.893	8.197	6.583	9.843	1	0
	Corals NoUp	Corals Up	14.554	13.533	15.559	13.485	12.213	14.767	1.069	-0.58	2.683	0	0.198
	Macroalgae EXP	Macroalgae SHE	1.962	0.691	3.337	7.301	5.91	8.691	-5.339	-7.277	-3.4	1	0
	Macroalgae NoUp	Macroalgae Up	3.177	1.989	4.424	6.693	5.302	8.146	-3.517	-5.391	-1.634	1	0
	Microphytobenthos EXP	Microphytobenthos SHE	0.43	0.087	0.808	1.889	1.075	2.756	-1.459	-2.411	-0.558	1	0.001
	Microphytobenthos NoUp	Microphytobenthos Up	1.233	0.644	1.854	1.086	0.429	1.799	0.148	-0.797	1.07	0	0.738
	Algal Turf	CCA	2.91	2.317	3.498	1.182	0.803	1.582	1.728	1.016	2.435	1	0
	Algal Turf	Corals	2.91	2.317	3.498	14.019	13.22	14.85	-11.109	-12.1	-10.085	1	0
	Algal Turf	Macroalgae	2.91	2.317	3.498	5.521	4.499	6.562	-2.611	-3.814	-1.432	1	0
	Algal Turf	Microphytobenthos	2.91	2.317	3.498	1.159	0.713	1.634	1.751	1.003	2.508	1	0
	CCA	Corals	1.182	0.803	1.582	14.019	13.22	14.85	-12.837	-13.741	-11.936	1	0
	CCA	Macroalgae	1.182	0.803	1.582	5.521	4.499	6.562	-4.339	-5.457	-3.247	1	0
	CCA	Microphytobenthos	1.182	0.803	1.582	1.159	0.713	1.634	0.023	-0.585	0.631	0	0.93
	Corals	Macroalgae	14.019	13.22	14.85	5.521	4.499	6.562	8.498	7.155	9.797	1	0
	Corals	Microphytobenthos	14.019	13.22	14.85	1.159	0.713	1.634	12.86	11.909	13.791	1	0
	Macroalgae	Microphytobenthos	5.521	4.499	6.562	1.159	0.713	1.634	4.362	3.242	5.514	1	0
	EXP	SHE	5.269	4.867	5.685	4.622	4.191	5.039	0.647	0.049	1.229	1	0.032
	NoUp	Up	4.81	4.432	5.183	5.035	4.589	5.49	-0.225	-0.811	0.363	0	0.448
total daily benthic net production
	EXP NoUp	SHE NoUp	161.429	131.072	192.413	132.143	96.511	168.483	29.286	-6.776	65.916	0	0.114
	EXP Up11	SHE Up11	125.64	88.459	163.854	103.673	66.793	141.614	21.967	-15.861	60.892	0	0.259
	EXP Up10	SHE Up10	268.632	231.425	307.134	244.401	207.416	283.538	24.231	-17.275	65.803	0	0.25
	EXP NoUp	EXP Up11	161.429	131.072	192.413	125.64	88.459	163.854	35.788	-8.263	79.768	0	0.112
	EXP NoUp	EXP Up10	161.429	131.072	192.413	268.632	231.425	307.134	-107.203	-150.627	-63.671	1	0
	SHE NoUp	SHE Up11	132.143	96.511	168.483	103.673	66.793	141.614	28.469	-20.137	74.689	0	0.238
	SHE NoUp	SHE Up10	132.143	96.511	168.483	244.401	207.416	283.538	-112.258	-159.933	-63.858	1	0
	EXP Up10	EXP Up11	268.632	231.425	307.134	125.64	88.459	163.854	142.991	97.276	188.084	1	0
	SHE Up10	SHE Up11	244.401	207.416	283.538	103.673	66.793	141.614	140.727	95.391	186.569	1	0
Total daily benthic gross production
	EXP NoUp	SHE NoUp	261.481	235.922	286.881	249.909	222.614	277.4	11.573	-25.775	48.95	0	0.543
	EXP Up11	SHE Up11	305.342	270.395	340.456	296.986	257.631	336.928	8.356	-44.963	61.246	0	0.751
	EXP Up10	SHE Up10	473.921	432.047	515.786	476.62	430.419	523.173	-2.7	-65.797	59.224	0	0.936
	EXP NoUp	EXP Up11	261.481	235.922	286.881	305.342	270.395	340.456	-43.861	-87.073	-0.633	1	0.045
	EXP NoUp	EXP Up10	261.481	235.922	286.881	473.921	432.047	515.786	-212.439	-260.657	-162.035	1	0
	SHE NoUp	SHE Up11	249.909	222.614	277.4	296.986	257.631	336.928	-47.077	-95.87	0.767	0	0.052
	SHE NoUp	SHE Up10	249.909	222.614	277.4	476.62	430.419	523.173	-226.712	-280.747	-173.18	1	0
	EXP Up10	EXP Up11	473.921	432.047	515.786	305.342	270.395	340.456	168.579	113.336	222.063	1	0
	SHE Up10	SHE Up11	476.62	430.419	523.173	296.986	257.631	336.928	179.635	118.329	240.631	1	0
